# Supplementary material
Source: Springer Nature journal article supplement (https://www.springermedizin.de/resource/supplementary/13017_2009_124_MOESM1_ESM.pdf/9635520)

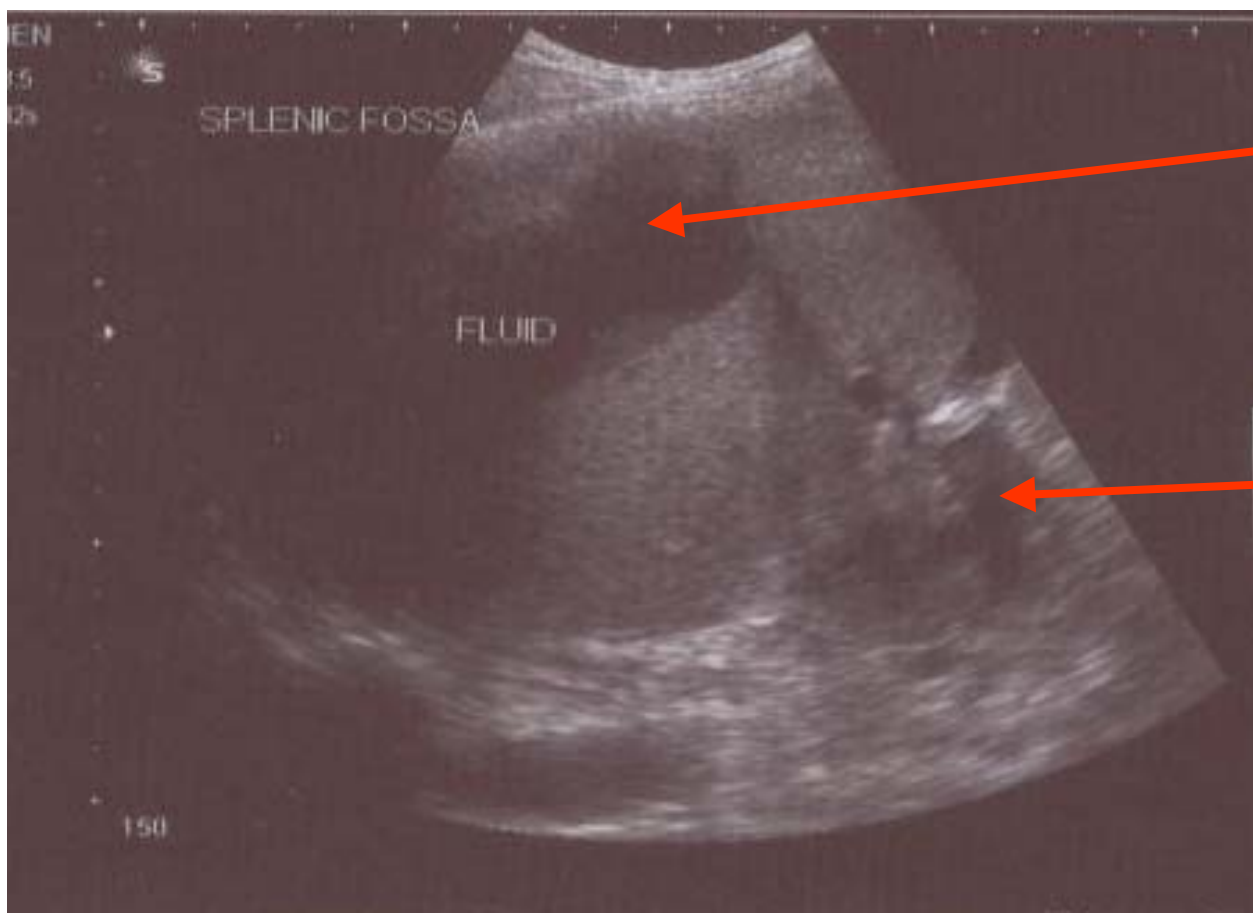

Peri splenic  
Hemoperitonem

Splenic tear

Supplement: MOESM1 [file 9635520]
